# Supplementary material
Source: MDPI journal article supplement (https://www.mdpi.com/2079-9284/9/6/112)
Supplement: s1 [file s1]

**Table S1.** Chemical structure of compounds in paper mulberry.

| Compound                                                                        | Chemical Structure                                                                    |
|---------------------------------------------------------------------------------|---------------------------------------------------------------------------------------|
| (-)-(2S)-kazinol I                                                              | 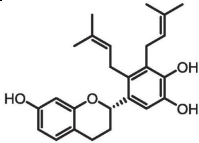   |
| (+)-pinoresinol-4'-O-β-D-glucopyranosyl-4''-O-β-D-apiofuranoside                |    |
| (2R)-7, 3', 4'-trihydroxy-6-prenylflavanone                                     |    |
| (2S)-2',4'-dihydroxy-2''-(1-hydroxy-1-methylethyl) dihydrofuro[2,3-h] flavanone |    |
| (2S)-abyssinone II                                                              |  |
| (S)-8-methoxymarmesin                                                           |  |
| 2-(4-hydroxyphenyl) propane-1,3-diol-1-O-β-D-glucopyranoside                    |  |
| 3, 5, 4'-trihydroxy-bibenzyl-3-O-β-D-glucoside                                  |  |
| 3,3',4',5,7-pentahydroxyflavone                                                 |  |
| 3,4,5-Trimethoxyphenyl-1-O-β-D-xylopyranosyl-β-D-glucopyranoside                |  |
| 3,4-dihydroxybenzoic acid                                                       |  |

|                                                                                       |  |
|---------------------------------------------------------------------------------------|--|
| 3,4-Dihydroxyisolonchocarpin                                                          |  |
| 3,5,7,4'-tetrahydroxy-3'-(2-hydroxy-3-methylbut-3-enyl) flavone                       |  |
| 3-[2-(4- hydroxyphenyl)-3-hydroxymethyl-2,3-dihydro-1-benzofuran-5-yl]propan-1-ol     |  |
| 3'-[γ-hydroxymethyl-(E)-γ-methylallyl]-2,4,2',4'-tetrahydroxychalcone 11'-O-coumarate |  |
| 3'-(3-methylbut-2-enyl)-3',4',7-trihydroxyflavane                                     |  |
| 4,5-Dicaffeoylquinic acid                                                             |  |
| 4-Caffeoylquinic acid                                                                 |  |
| 4-Feruloylquinic acid                                                                 |  |
| 4-hydroxybenzaldehyde                                                                 |  |
| 4-hydroxyisolonchocarpin                                                              |  |
| 5,7,2',4'-tetrahydroxy-3-geranylflavone                                               |  |

|                                                                              |                                                                                       |
|------------------------------------------------------------------------------|---------------------------------------------------------------------------------------|
| 5,7,3',4'-tetrahydroxy-3-methoxy-8,5'-diprenylflavone                        | 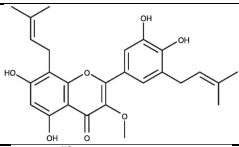   |
| 5,7,3',4'-tetrahydroxy-3-methoxy-8-geranylflavone                            |    |
| 5,7,3',4'-tetrahydroxy-3-methoxyflavone                                      |    |
| 5,7,3',5'-tetrahydroxyflavanone                                              |    |
| 5-Caffeoylquinic acid                                                        |    |
| 7,4'-dihydroxy-3'-prenylflavan                                               |   |
| 7,8-dihydroxy-6-(3-methylbut-2-en-1-yl)-2H-chromen-2-one                     |  |
| 7-hydroxycoumarin                                                            |  |
| 8-(1,1-Dimethylallyl)-5'-(3-methylbut-2-enyl)-3',4',5,7-tetrahydroxyflavonol |  |
| 8,11-Octadecadienoic acid                                                    |   |
| 8-Octadecenoic acid                                                          |  |
| Apigenin                                                                     |  |
| Apigenin-6-C-β-D-glucopyranside                                              |  |
| Apigenin-7-glucoside                                                         |  |
| Apigenin-7-O-glucuronide                                                     |  |

|                                    |                                                                                       |
|------------------------------------|---------------------------------------------------------------------------------------|
| Apigenin-7-O- $\beta$ -D-glucoside | 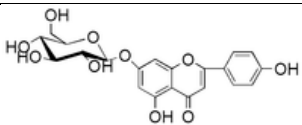    |
| Arbutine                           |    |
| Betulin                            |    |
| Betulinic acid                     |    |
| Brossoflurenone A                  |    |
| Brossoflurenone B                  |   |
| Brossoflurenone C                  |  |
| Broussin                           |  |
| Broussoaurone A                    |  |
| Broussochalcone A                  |  |
| Broussochalcone B                  |  |
| Broussochalcone C                  |  |
| Broussocoumarin A                  |  |

|                     |  |
|---------------------|--|
| Broussoflavan A     |  |
| Broussoflavanonol A |  |
| Broussoflavonol B   |  |
| Broussoflavonol C   |  |
| Broussoflavonol F   |  |
| Broussoflavonol G   |  |
| Broussoflavonol H   |  |
| Broussoflavonol I   |  |
| Broussoflavonol J   |  |
| Broussoflavonol K   |  |
| Broussetone A       |  |
| Broussetone B       |  |

|                  |                                                                                       |
|------------------|---------------------------------------------------------------------------------------|
| Broussonetone C  | 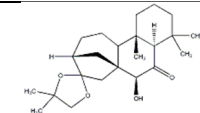   |
| Broussonin A     |    |
| Broussonin B     |    |
| Broussonol D     |    |
| Broussonol G     |    |
| Broussonpapyrine |    |
| Broussoside A    |    |
| Broussoside B    |  |
| Broussoside C    |   |
| Broussoside D    |  |
| Broussoside E    |   |
| Caffeic acid     |  |

|                              |                                                                                       |
|------------------------------|---------------------------------------------------------------------------------------|
| Caryophyllene                | 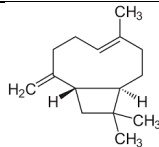   |
| Cathayanon H                 |    |
| Chelerythrine                |    |
| Chlorogenic acid             |    |
| Chrysoriol-7-O-β-D-glucoside |     |
| Chushizisin A                |   |
| Chushizisin B                |  |
| Chushizisin C                |  |
| Chushizisin D                |  |
| Chushizisin E                |  |
| Chushizisin F                |  |
| Chushizisin G                |  |
| Chushizisin H                |  |

|                                                |                                                                                       |
|------------------------------------------------|---------------------------------------------------------------------------------------|
| Chushizisin I                                  | 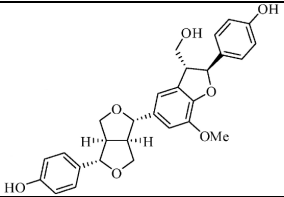   |
| <i>cis</i> -coniferin                          |    |
| <i>cis</i> -form-5-coffee acylchlorogenic acid |    |
| <i>cis</i> -syringin                           |    |
| Coniferyl alcohol                              |    |
| Cosmosiin                                      |    |
| Coumaric acid                                  |    |
| Cryptochlorogenic acid                         |  |
| Curculigoside C                                |  |
| Curculigoside I                                |  |
| Daphnegiravan H                                |  |
| Demethylmoracin I                              |  |
| Dihydroconiferyl alcohol                       |  |
| Dihydrosanguinarine                            |  |
| Dihydrosyringin                                |   |



|                                                                                                                 |  |
|-----------------------------------------------------------------------------------------------------------------|--|
| Epicatechin                                                                                                     |  |
| <i>erythro</i> -1-(4-hydroxy-3-methoxyphenyl)-2-{4-[(E)-3-hydroxy-1-propenyl]-2-methoxyphenoxy}-1,3-propanediol |  |
| <i>erythro</i> -1-(4-hydroxyphenyl) glycerol                                                                    |  |
| Ferulic acid                                                                                                    |  |
| Fipsotwin                                                                                                       |  |
| Flacourtin                                                                                                      |  |
| Gentisoyl hexoside                                                                                              |  |
| Glyasperin A                                                                                                    |  |
| Glycyrrhiza flavonol A                                                                                          |  |
| Heptadecene-8-carbonic acid                                                                                     |  |
| Hexadecanoic acid                                                                                               |  |
| Isogemichalcone C                                                                                               |  |

|                   |                                                                                       |
|-------------------|---------------------------------------------------------------------------------------|
| Isolicoflavonol   | 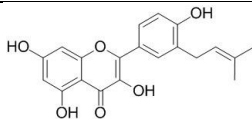   |
| Isoliquiritigenin |    |
| Isorientin        |     |
| Isoquercetin      |    |
| Isovitexin        |    |
| Kaempferol        |   |
| Kazinol A         |  |
| Kazinol B         |  |
| Kazinol E         |  |
| Kazinol F         |  |
| Kazinol J         |  |
| Kazinol M         |  |

|                                  |  |
|----------------------------------|--|
| Kazinol N                        |  |
| Kazinol Q                        |  |
| Kazinol V                        |  |
| Kazinol W                        |  |
| Linolenic acid                   |  |
| Liriodendrin                     |  |
| Liriodenine                      |  |
| Luteolin                         |  |
| Luteolin-7-O-glucuronide         |  |
| Luteolin-7-O-β-D-glucopyranoside |  |
| Luteoloside                      |  |
| Marmesin                         |  |
| Nitidine                         |  |

|                                      |                                                                                       |
|--------------------------------------|---------------------------------------------------------------------------------------|
| N-Norchelerythrine                   | 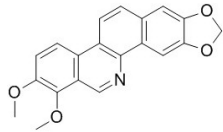   |
| Oleanolic acid                       |    |
| Oleic acid                           |     |
| Orientin                             |    |
| Oxyavicine                           |    |
| Palmitic acid                        |     |
| Papyriflavonol A                     |   |
| <i>p</i> -coumaraldehyde             |  |
| Pinoresinol-4'-O-β-D-glucopyranoside |   |
| Poliothyrsoside                      |  |
| Polysaccharides                      |  |
| Protocatechuic acid                  |  |
| Quercetin                            |  |
| Stearic acid                         |   |

|                                                                                                                        |                                                                                       |
|------------------------------------------------------------------------------------------------------------------------|---------------------------------------------------------------------------------------|
| Syringaresinol-4'-O-β-D-glucoside                                                                                      | 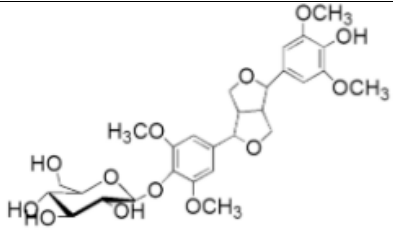    |
| <i>threo</i> -1-(4-hydroxy-3-methoxyphenyl)-2-{4-[( <i>E</i> )-3-hydroxy-1-propenyl]-2-methoxyphenoxy}-1,3-propanediol |    |
| <i>threo</i> -1-(4-hydroxyphenyl) glycerol                                                                             |    |
| <i>threo</i> -dadahol A                                                                                                |     |
| <i>threo</i> -dadahol B                                                                                                |    |
| Uralenol                                                                                                               |  |
| Ursolic acid                                                                                                           |  |
| Vitexin                                                                                                                |  |
| Vomifoliol                                                                                                             |  |
